# Supplementary material
Source: Springer Nature journal article supplement (https://www.springermedizin.de/resource/supplementary/12865_2009_248_MOESM9_ESM.pdf/9427594)

**+/+****+/kd**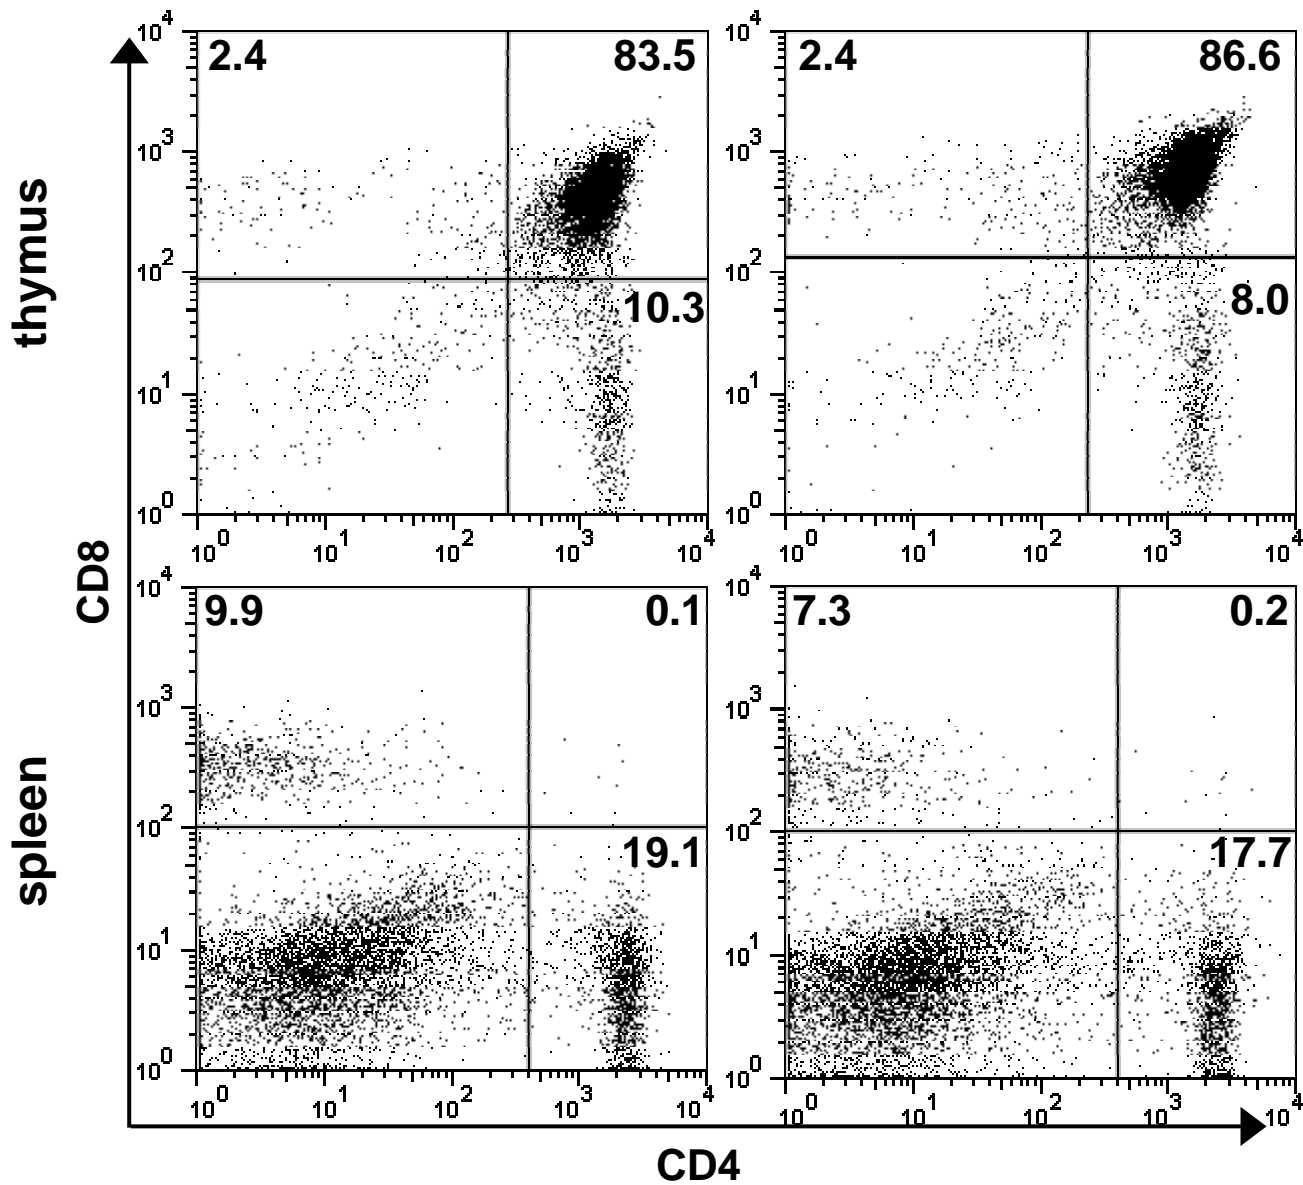

Supplement: MOESM9 [file 9427594]
